# Supplementary material for: A novel fluorescent peptidyl probe for highly sensitive and selective ratiometric detection of Cd(ii) in aqueous and bio-samplesviametal ion-mediated self-assembly
Source: Royal Society of Chemistry journal article supplement (doi:10.1039/c8nj02298d), 2018-01-01
Supplement: c8nj02298d1.pdf [file c8nj02298d1.pdf]

Electronic Supplementary Information

A novel fluorescent peptidyl probe for highly sensitive and selective ratiometric detection of Cd(II) in aqueous and bio-samples via metal ion-mediated self-assembly

Kwan Ho Jung,<sup>a</sup> Semin Oh,<sup>a</sup> Joohee Park,<sup>a</sup> Yu Jin Park,<sup>a</sup> See-Hyoung Park,<sup>\*,b</sup> and Keun-Hyeung Lee<sup>\*,a</sup>

<sup>a</sup>Center for Design and Applications of Molecular Catalysts, Department of Chemistry and Chemical Engineering, Inha University, Incheon, 402-751, South Korea. <sup>b</sup>Department of Bio and Chemical Engineering, Hongik University, Sejong 30016, Republic of Korea

E-mail: leekh@inha.ac.kr (K. -H. Lee)

**Contents**

|                                                                                                               |     |
|---------------------------------------------------------------------------------------------------------------|-----|
| Scheme S1. Synthesis scheme of <b>1</b>                                                                       | S2  |
| Figure S1. HPLC chromatogram of <b>1</b>                                                                      | S3  |
| Figure S2. ESI-Mass spectrum of <b>1</b>                                                                      | S4  |
| Figure S3. <sup>1</sup> H NMR of <b>1</b>                                                                     | S5  |
| Figure S4. <sup>13</sup> C NMR of <b>1</b>                                                                    | S6  |
| Figure S5. Solvent effect on fluorescence emission spectra of <b>1</b> with Cd <sup>2+</sup>                  | S7  |
| Figure S6. Intensity ratio change of <b>1</b> with Cd <sup>2+</sup>                                           | S8  |
| Figure S7. Emission intensity ratio of <b>1</b> induced by various sources of Cd <sup>2+</sup>                | S9  |
| Figure S8. Interference effect of metal ion on the ratiometric response to Cd <sup>2+</sup>                   | S10 |
| Figure S9. Florescent spectra of <b>1</b> with Cd <sup>2+</sup> in aqueous solutions containing 3% DMF        | S11 |
| Figure S10. Job's Plot for <b>1</b> with Cd <sup>2+</sup>                                                     | S12 |
| Figure S11. Non-linear least square fitting of the intenisty as a fuction of cocentration of Cd <sup>2+</sup> | S13 |
| Figure S12. Reversibility of <b>1</b> for Cd <sup>2+</sup>                                                    | S14 |
| Figure S13. CD Spectra of <b>1</b> in the presence and absence of Cd <sup>2+</sup>                            | S15 |
| Figure S14. Linear curve fitting of intensity ratio as a function of Cd <sup>2+</sup> in urine samples        | S16 |
| Figure S15. Ratiometric response to Cd <sup>2+</sup> in ground water samples                                  | S17 |
| Figure S16. Stability performance of <b>1</b>                                                                 | S18 |
| Figure S17. Toxicity study of <b>1</b> for cells                                                              | S19 |
| Table S1. Comparison of the properties of ratiometric fluorescent probes for Cd(II)                           | S20 |
| References                                                                                                    | S21 |

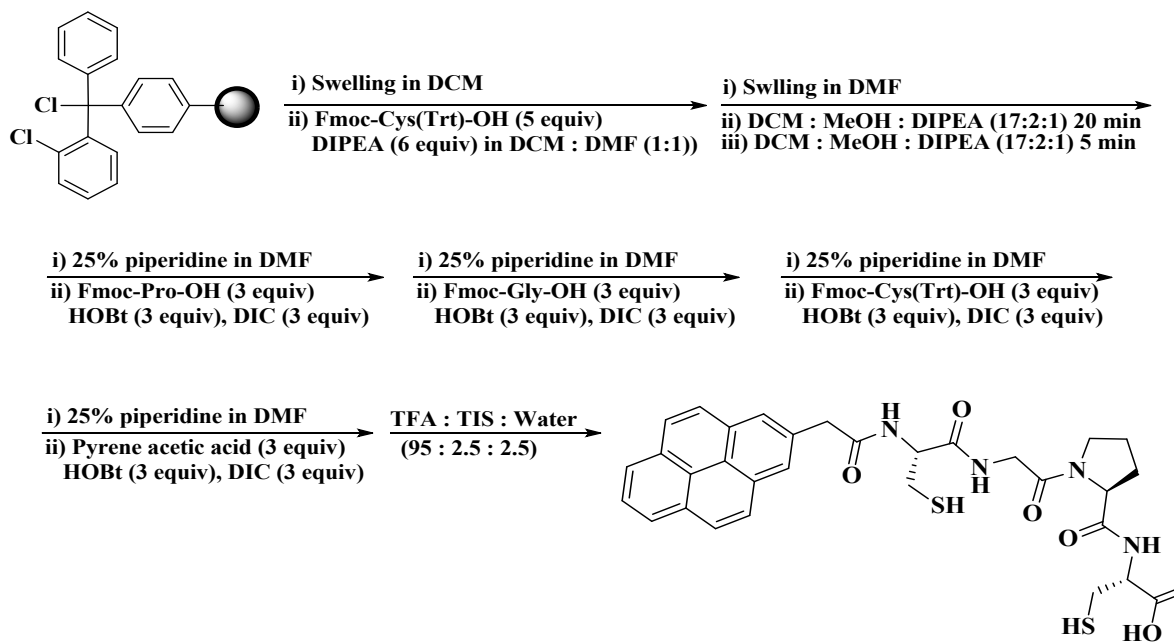

**Scheme S1.** Synthetic scheme of **1**.

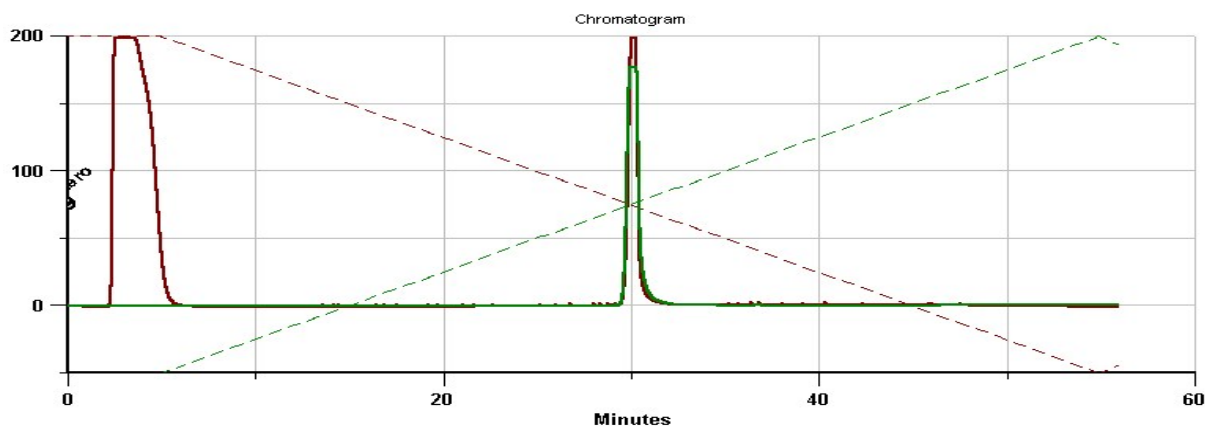

Figure S1. HPLC chromatogram of 1.

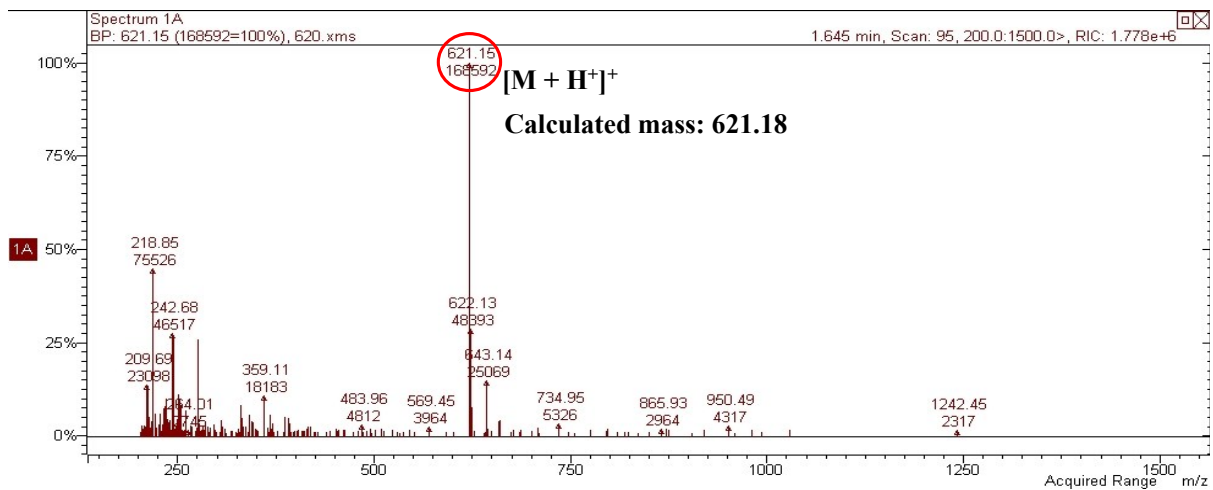

Figure S2. ESI-Mass spectrum of 1.

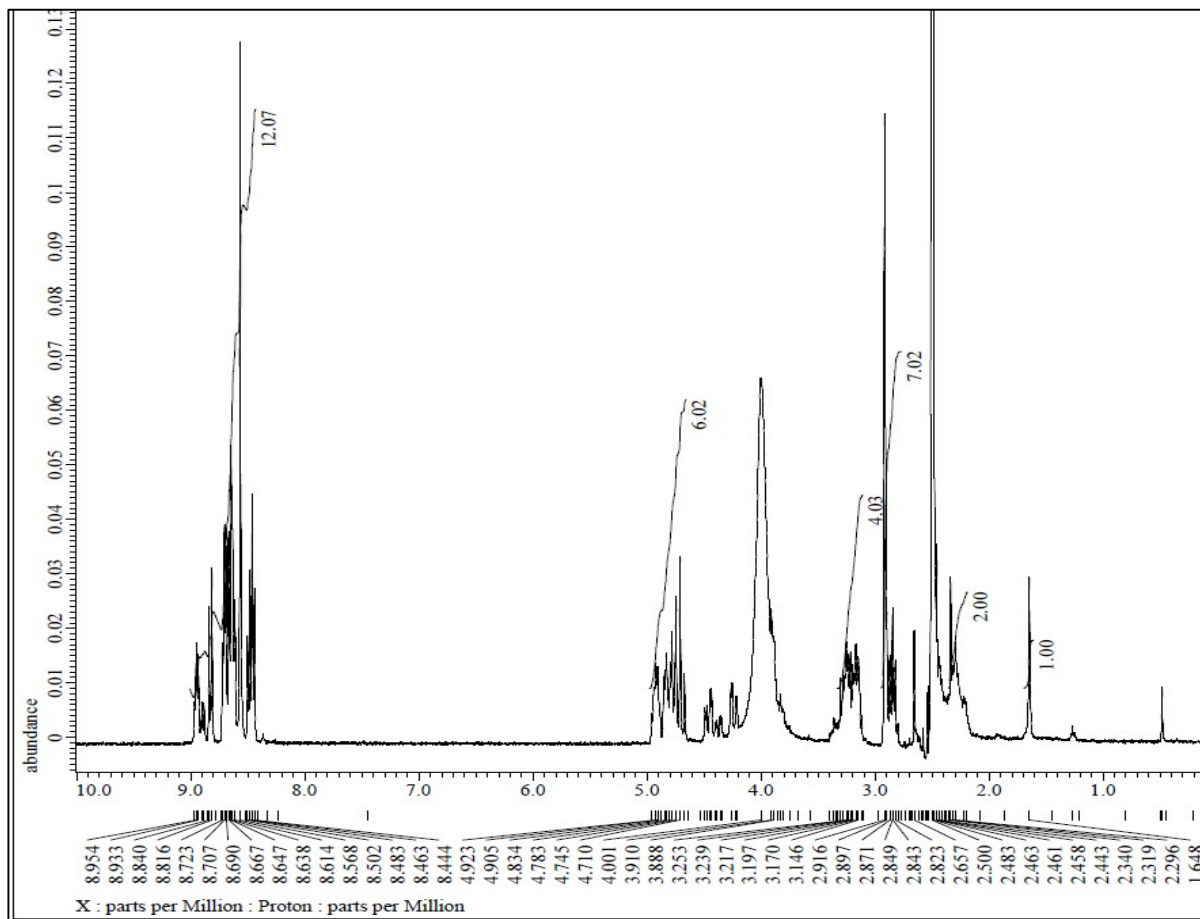

Figure S3. <sup>1</sup>H NMR of 1.

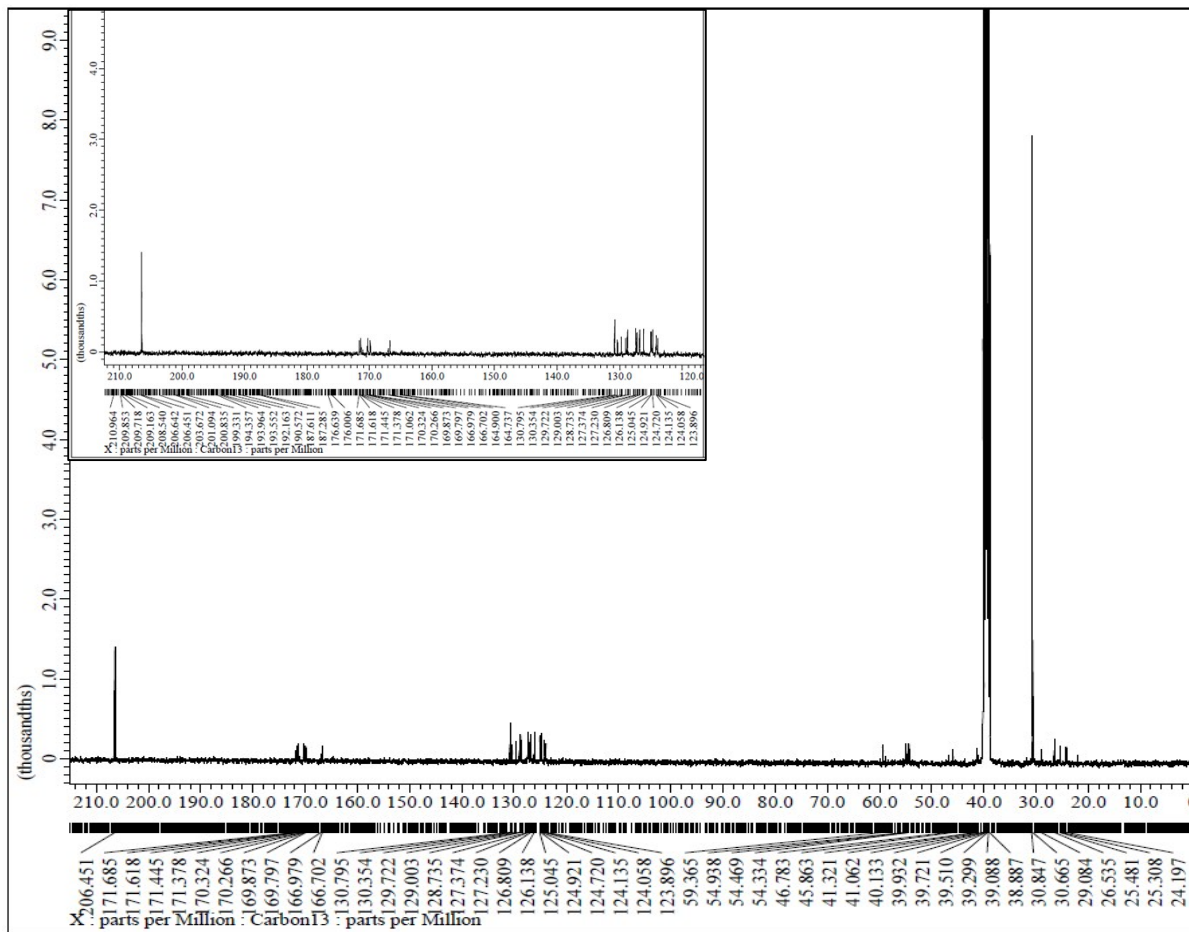

Figure S4.  $^{13}\text{C}$  NMR of 1.

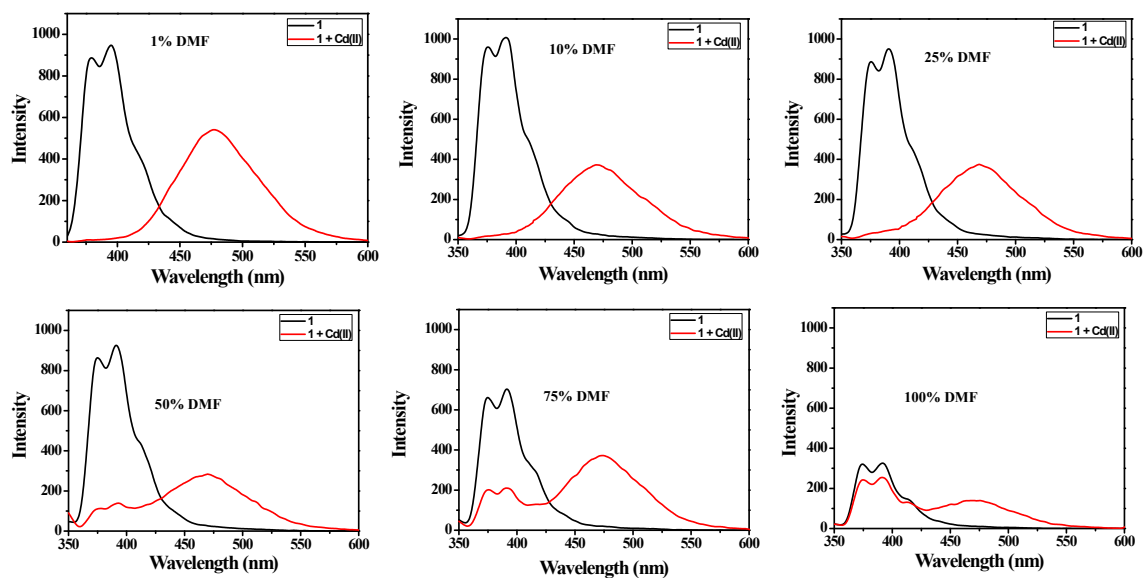

**Figure S5.** Fluorescence emission spectra of **1** (15  $\mu\text{M}$ ) with  $\text{Cd}^{2+}$  (15  $\mu\text{M}$ ) in aqueous buffered solutions (10 mM, HEPES, pH 7.4) containing various volume of DMF.

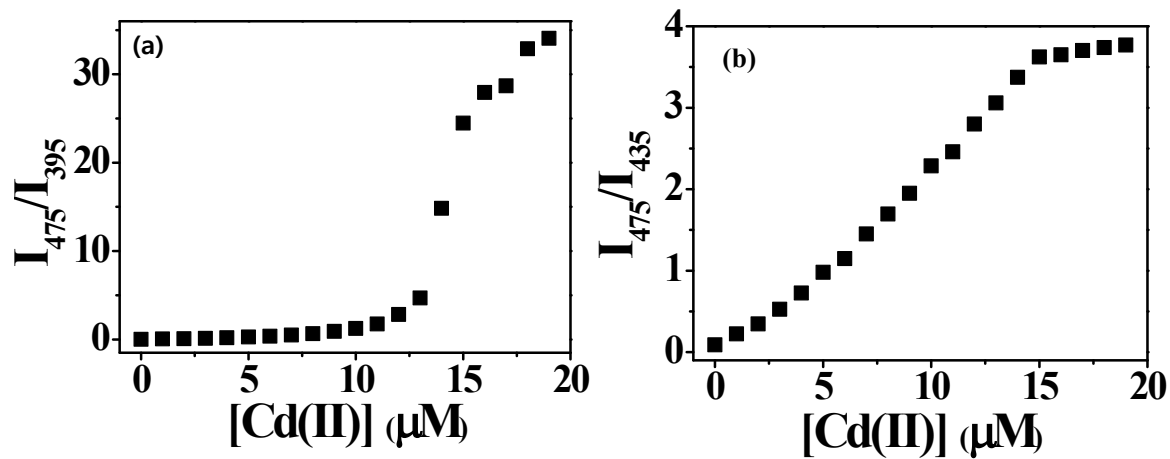

**Figure S6.** Intensity ratio change (a,  $I_{475}/I_{395}$ ; b,  $I_{475}/I_{435}$ ) of **1** (15 μM) as a function of Cd<sup>2+</sup> in aqueous buffered solution (10 mM HEPES, pH 7.4) containing 1% DMF (λ<sub>ex</sub> = 342 nm).



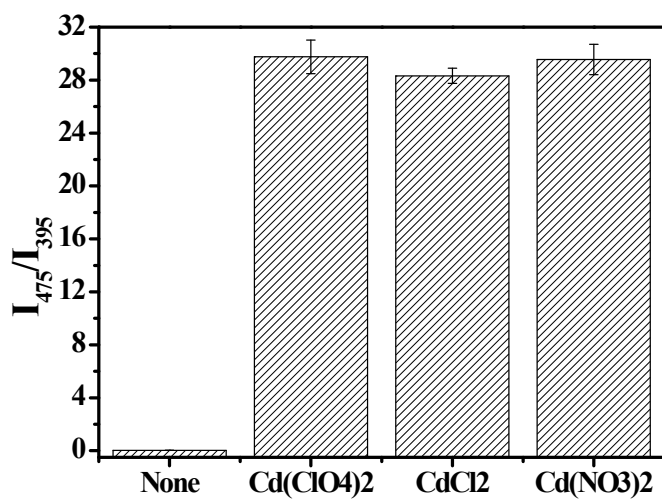

**Figure S7.** Emission intensity ratio of **1** (10  $\mu$ M) induced by various sources of Cd<sup>2+</sup> (1 equiv) in aqueous buffered solution (10mM HEPES, pH 7.4) containing 1% DMF .

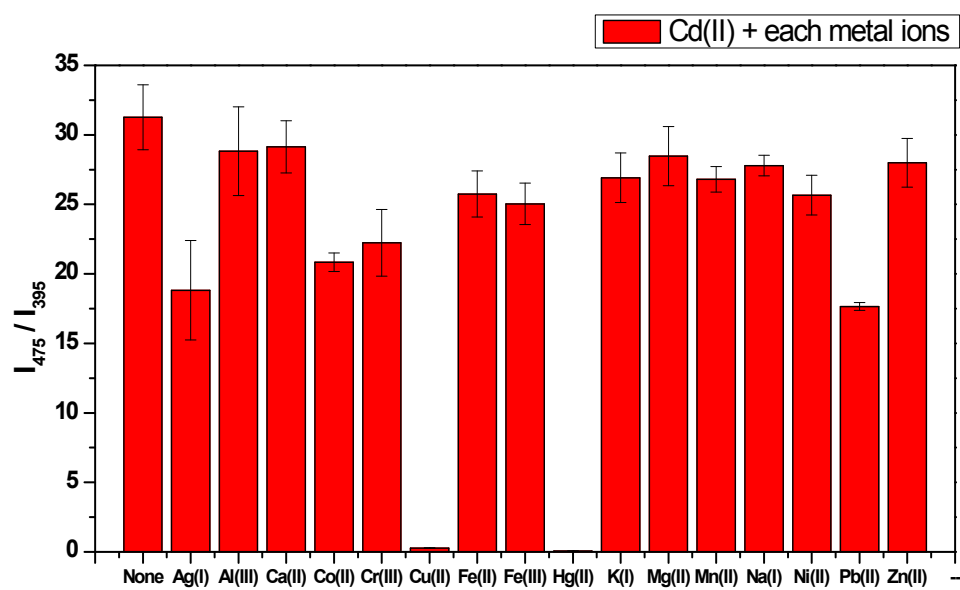

**Figure S8.** Emission intensity ratio of **1** (15  $\mu\text{M}$ ) in the presence of  $\text{Cd}^{2+}$  (1 equiv) and various metal ions (5 equiv) in aqueous buffered solution (10mM HEPES, pH 7.4) containing 1% DMF.

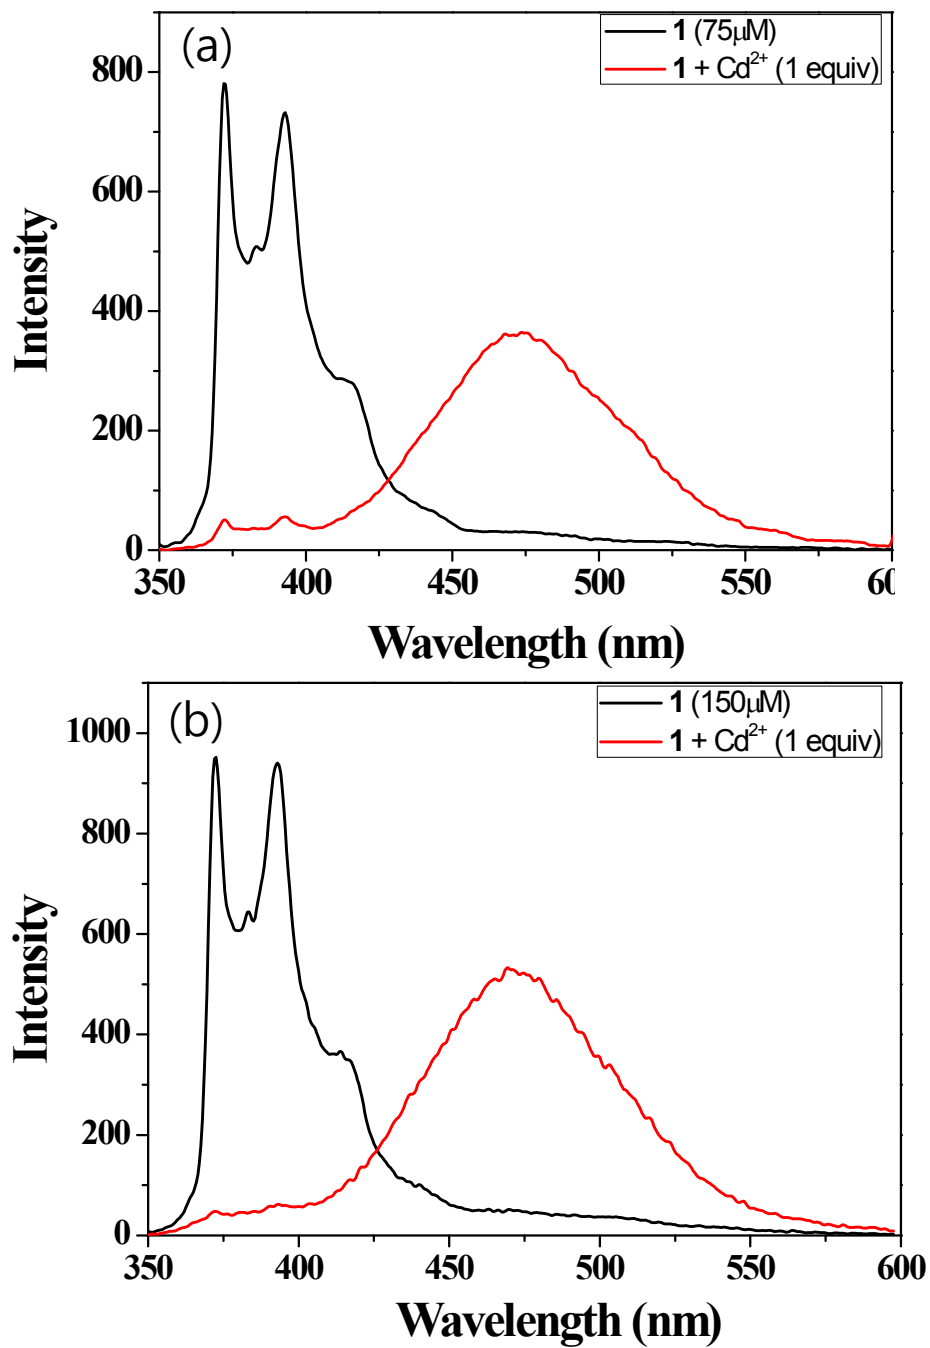

**Figure S9.** Fluorescence emission spectra of **1** (a; 75  $\mu\text{M}$ , b; 150  $\mu\text{M}$ ) in the absence and presence of  $\text{Cd}^{2+}$  (1 equiv) in aqueous buffered solutions (2 mM, HEPES, pH 7.4) containing 3% DMF ( $\lambda_{\text{ex}} = 342 \text{ nm}$ ).

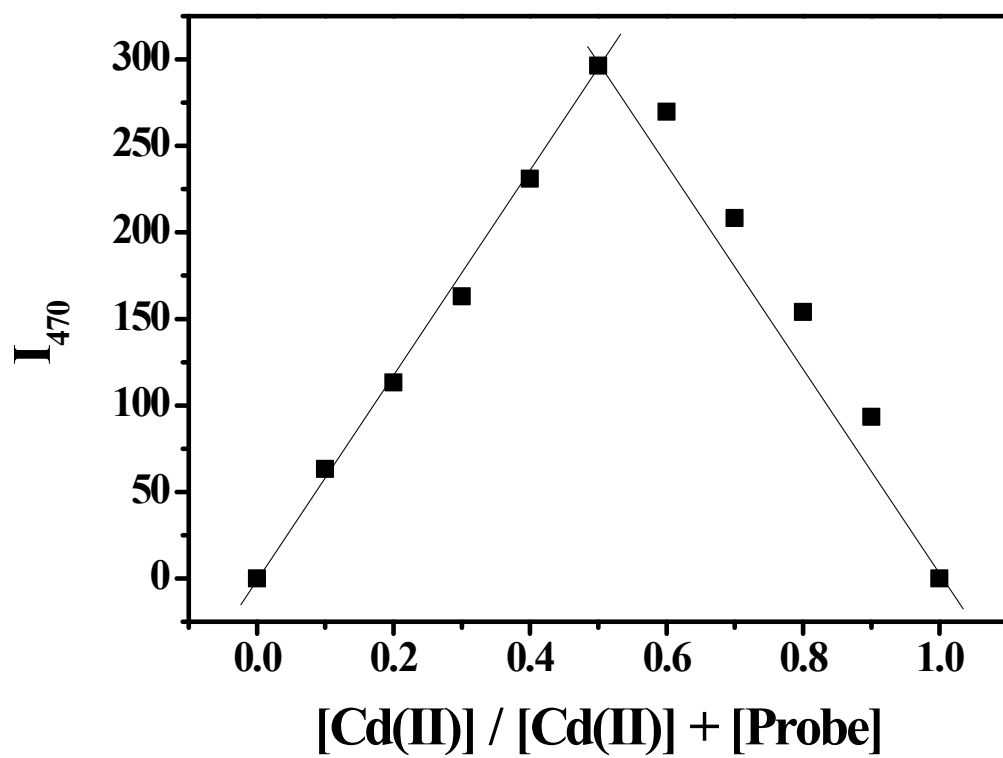

**Figure S10.** Job's plot for **1** with  $\text{Cd}^{2+}$  in aqueous buffered solution (10 mM HEPES, pH 7.4) containing 1% DMF; total concentration = 15  $\mu\text{M}$ , slit 15/12 nm, 1% attenuator ( $\lambda_{\text{ex}} = 342 \text{ nm}$ ).

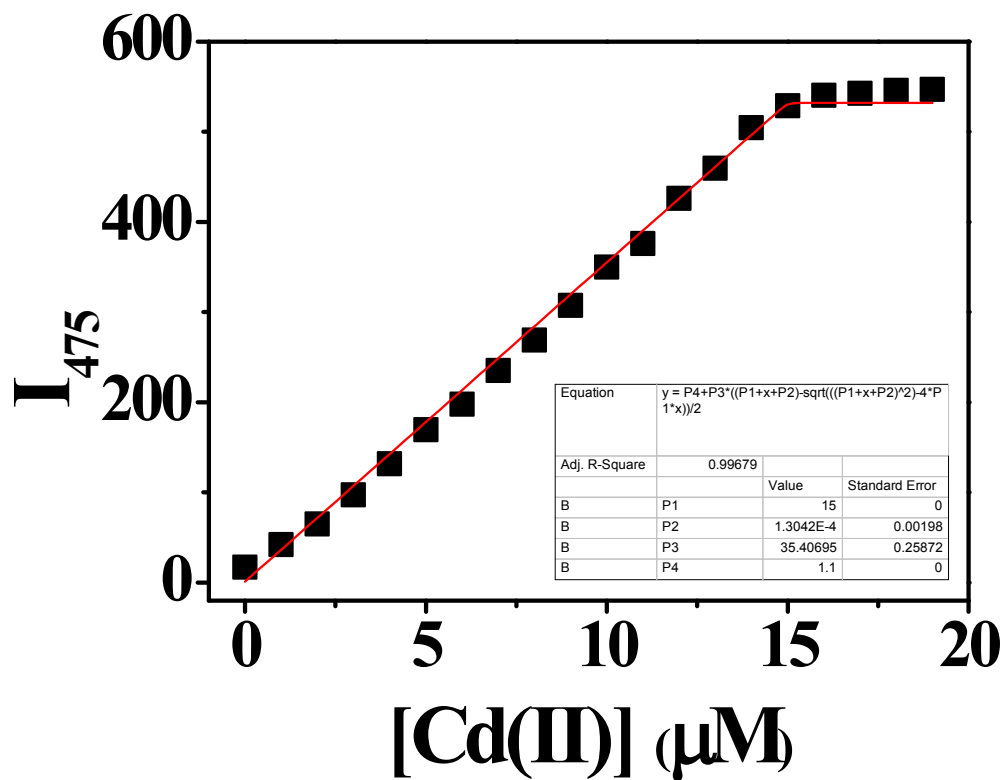

**Figure S11.** Non-linear least square fitting of the emission intensity of **1** (15  $\mu M$ ) as a function of concentration of  $Cd^{2+}$  by a 1:1 complex model.

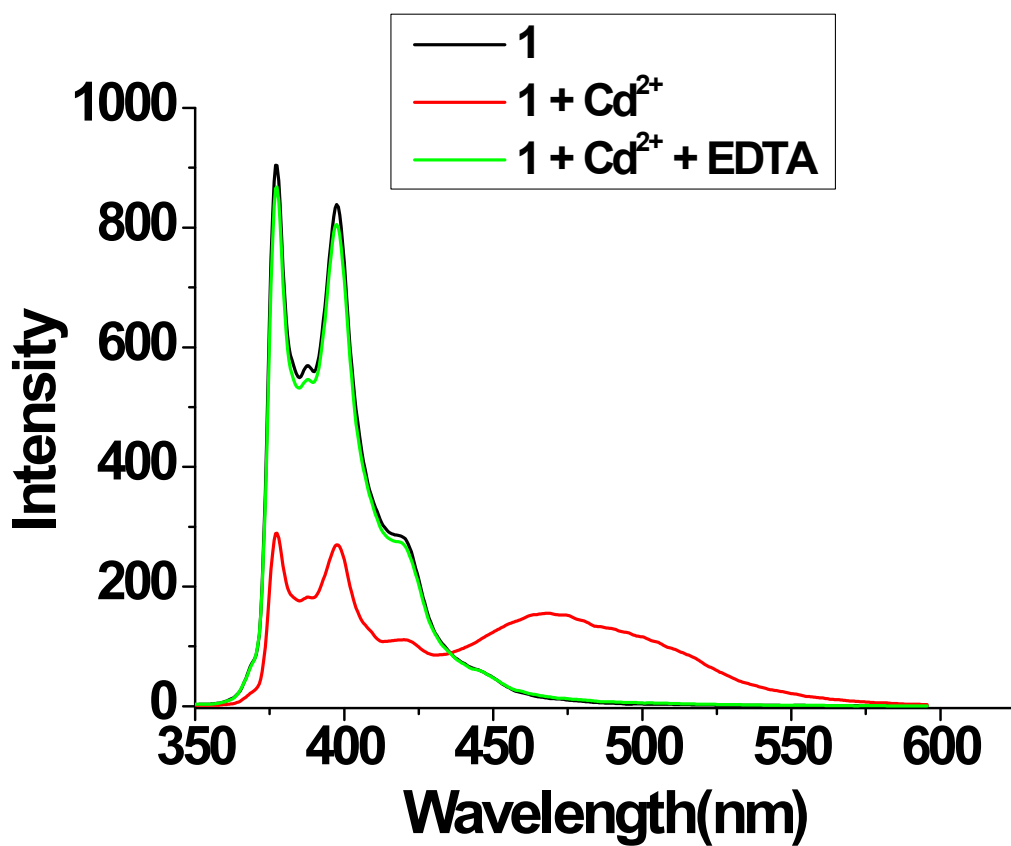

**Figure S12.** Fluorescence emission spectra of **1** (10  $\mu\text{M}$ ) in the absence and presence of  $\text{Cd}^{2+}$  (1 equiv) and EDTA (1 equiv) in aqueous buffered solutions (10 mM, HEPES, pH 7.4) containing 1% DMF ( $\lambda_{\text{ex}} = 342 \text{ nm}$ ).

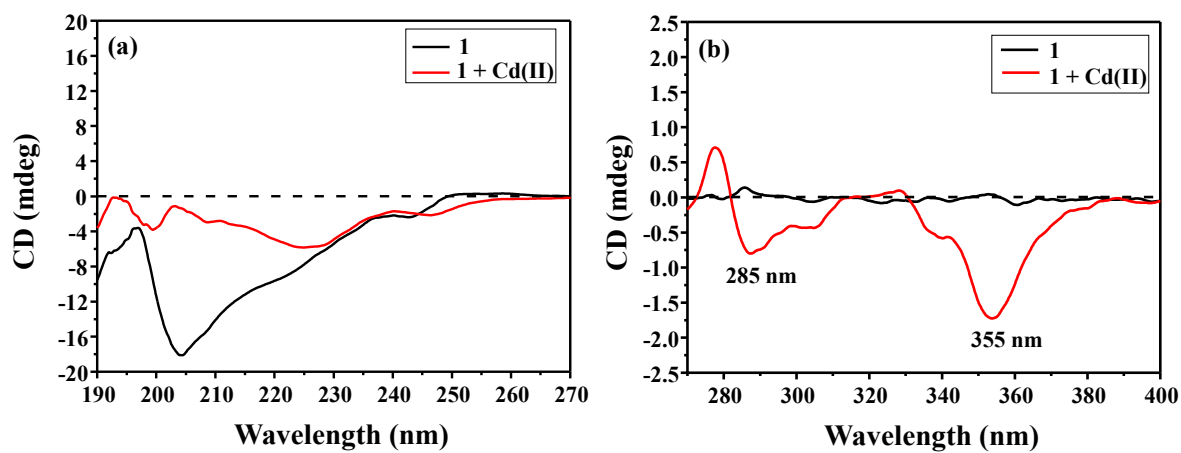

**Figure S13.** (a) Far- and (b) Near-UV CD Spectra of **1** (75  $\mu\text{M}$ ) in the absence or presence of  $\text{Cd}^{2+}$  (75  $\mu\text{M}$ ) in aqueous buffered solutions (10 mM PBS, pH 7.4) containing 5% (v/v) 2,2,2-trifluoroethanol.

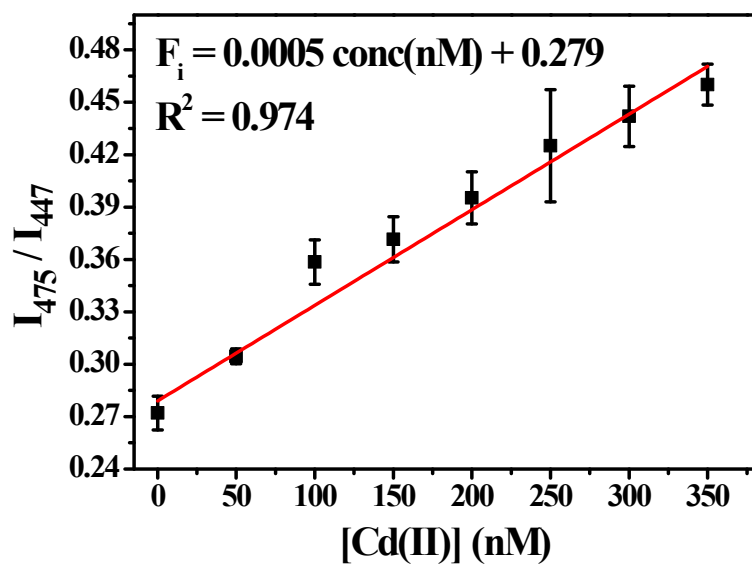

**Figure S14.** Linear curve fitting of emission intensity ratio change of **1** (15  $\mu\text{M}$ ) as a function of the concentration of  $\text{Cd}^{2+}$  in aqueous buffered solutions (10 mM, HEPES, pH 7.4) containing urine samples.



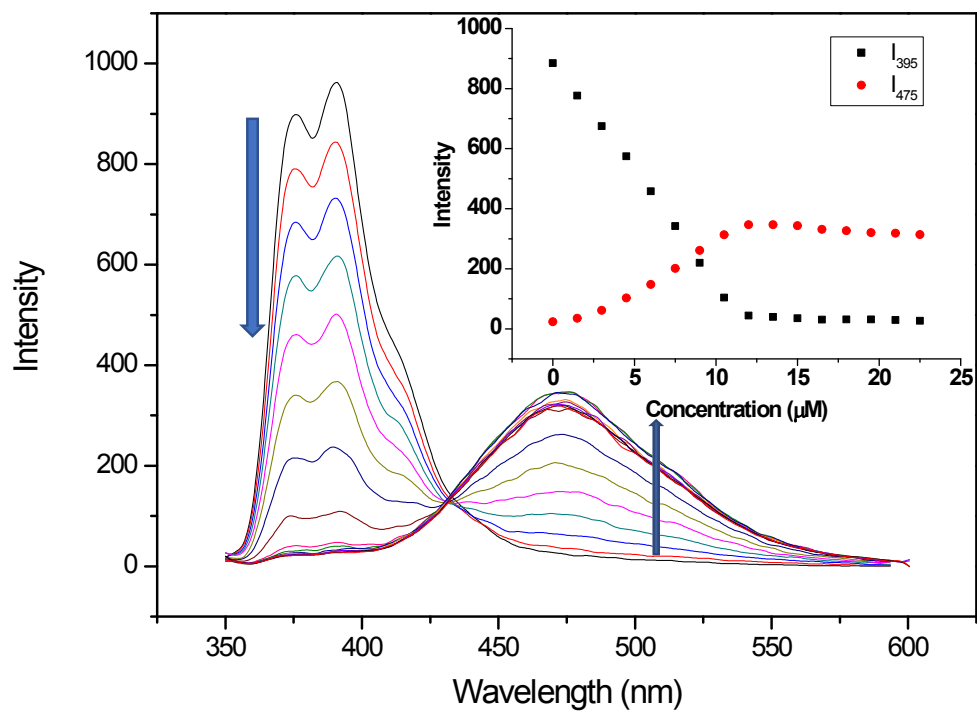

**Figure S15.** Emission spectra of **1** (15 μM) with increasing concentration of Cd<sup>2+</sup> in aqueous buffered solutions (10 mM HEPES, pH 7.4) containing ground waters.

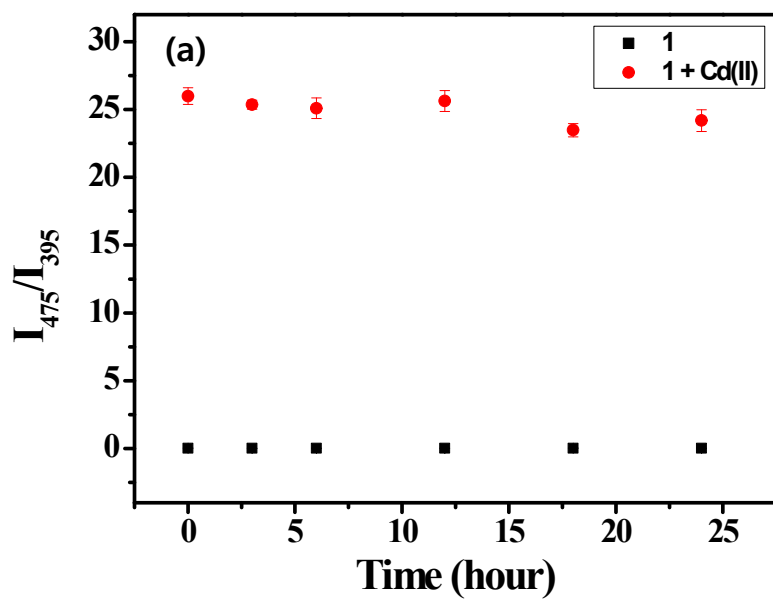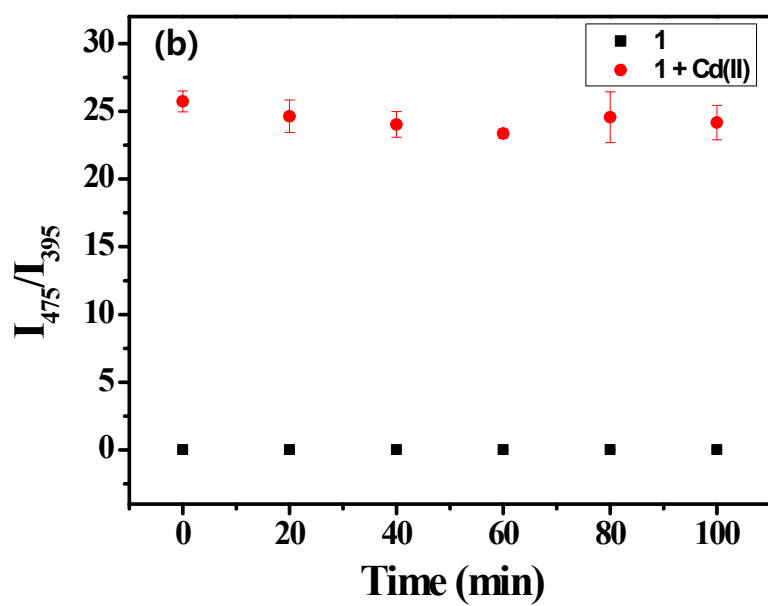

**Figure S16.** (a) Incubation of stock solution of **1** at room temperature for 24 hrs and emission intensity ratio of **1** (15  $\mu\text{M}$ ) by  $\text{Cd}^{2+}$  (15  $\mu\text{M}$ ) (b) Upon addition of  $\text{Cd}^{2+}$  into the solution containing **1**, emission intensity ratio induced by  $\text{Cd}^{2+}$  for 100 mins in aqueous buffered solutions (10 mM, HEPES, pH 7.4) containing 1% DMF.

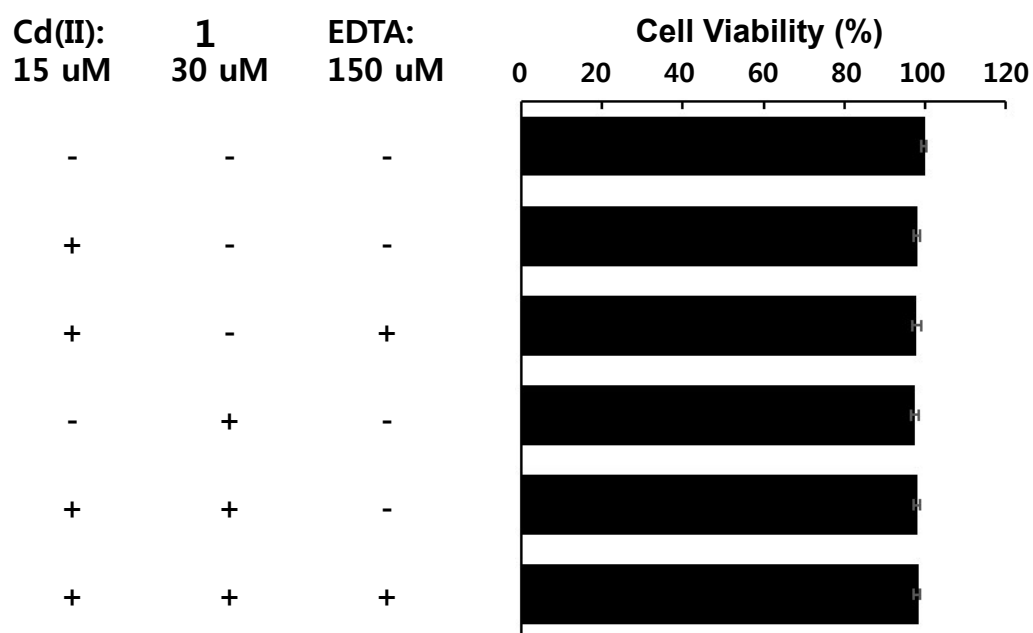

**Figure S17.** MTS assay for the viability of MDA-MB-231 cells in DMEM 10% FBS treated with **1**, **1** + Cd(ClO<sub>4</sub>)<sub>2</sub>, and **1** + Cd(ClO<sub>4</sub>)<sub>2</sub> + EDTA for 24 h.

**Table S1** Comparison of the properties of ratiometric fluorescent probes for Cd(II) in aqueous solution.<sup>1-11</sup>

| Fluorophore(s)                                    | Organic cosolvent | Emission bands (nm) | Change (fold)   | LOD             | Response                                                       | Application       |
|---------------------------------------------------|-------------------|---------------------|-----------------|-----------------|----------------------------------------------------------------|-------------------|
| Dansyl Trp                                        | 0%                | 350 to 500          | 9               | 0.9 $\mu$ M     | Hg(II), Zn(II), Ag(I)                                          | No cell image     |
| Dansyl Trp                                        | 0%                | 350 to 500          | 4               | 0.3 $\mu$ M     | Cu(II), Zn(II)                                                 | No cell image     |
| 5-Dimethylamino-2-(2-pyridinyl)-benzimidazole)    | 0%                | 493 to 587          | 8               | 0.3 pM          | Zn(II)                                                         | Cell image        |
| Coumarin                                          | 0%                | 328 to 368          | 3.5             | 40 pM           | Zn(II)                                                         | Cell image        |
| 4,5-Diamino-1,8-naphthalimide                     | 10% EtOH          | 487 to 531          | 3               | 0.1 $\mu$ M     | Zn(II)                                                         | No cell image     |
| Boradiazaindacene (BODIPY)                        | 90% Acetone       | 550 to 800          | 13              | ND <sup>a</sup> | Cr(III), Ni(II), Cu(II)                                        | Cell image        |
| 8-Hydroxyquinoline norbornene                     | 50% Methanol      | 330 to 600          | 2               | 1.6 nM          | Zn(II)                                                         | Paper strip       |
| 8-Hydroxyquinoline                                | 80% Ethanol       | 350 to 650          | 4.5             | 23.6 nM         | Zn(II)                                                         | Cell image        |
| 8-Hydroxy-2-methylquinoline                       | 80% Dioxane       | 400 to 700          | 92              | 20 nM           | Cu(II), Zn(II)                                                 | No cell image     |
| 4-Isobutoxy-6-(dimethylamino)-8-methoxyquinaldine | 0%                | 400 to 700          | 3               | 9.6 pM          | Mn(II), Fe(II), Co(II), Ni(II), Cu(II), Hg(II), Pb(II), Zn(II) | Cell image        |
| Phenanthro[9,10-d]oxazole                         | 50% DMF           | 400 to 600          | ND <sup>a</sup> | ND <sup>a</sup> | Fe(III), Hg(II), Pb(II), Cu(II)                                | Paper strip       |
| Pyrene (Present work)                             | 1% DMF            | 395 to 475          | 28              | 22 nM           | Only Cd(II)                                                    | Cell image, Urine |

<sup>a</sup>ND means not determined.

## References

- 1 B. P. Joshi, J. Park, W. I. Lee, K. H. Lee, *Talanta.*, 2009, **78**, 903–909.
- 2 Y. Li, L. Li, X. Pu, G. Ma, E. Wang, J. Kong, Z. Liu, Y. Liu, *Bioorg. Med. Chem. Lett.*, 2012, **22**, 4014–4017.
- 3 Z. Liu, C. Zhang, W. He, Z. Yang, X. Gao, Z. Guo, *Chem. Commun.*, 2010, **46**, 6138–6140.
- 4 M. Taki, M. Desaki, A. Ojida, S. Iyoshi, T. Hirayama, I. Hamachi, Y. Yamamoto, *J. Am. Chem. Soc.*, 2008, **130**, 12564–12565.
- 5 C. Lu, Z. Xu, J. Cui, R. Zhang, X. Qian, *J. Org. Chem.*, 2007, **72**, 3554–3557.
- 6 X. Peng, J. Du, J. Fan, J. Wang, Y. Wu, J. Zhao, S. Sun, T. Xu, *J. Am. Chem. Soc.*, 2007, **129**, 1500–1501.
- 7 S. Sarkar, R. Shunmugam, *ACS Appl. Mater. Interfaces.*, 2013, **5**, 7379–7383.
- 8 Z. Shi, Q. Han, L. Yang, H. Yang, X. Tang, W. Dou, Z. Li, Y. Zhang, Y. Shao, L. Guan, W. Liu, *Chem. Eur. J.*, 2015, **21**, 290–297.
- 9 Y. Bao, B. L. Liu, H. Wang, F. Du, R. Bai, *Anal. Methods.*, 2011, **3**, 1274–1276.
- 10 L. Xue, G. Li, Q. Liu, H. Wang, C. Liu, X. Ding, S. He, H. Jiang, *Inorg. Chem.*, 2011, **50**, 3680–3690.
- 11 L. Ahang, Q. Tong, L. Shi, *Dalton Trans.*, 2013, **42**, 8567–8570.
